# Supplementary material
Source: PubMed Central journal article supplement (PMC8888129)
Supplement: NIHMS1772491-supplement-Figures_S1_S5_and_Table_S2.pdf [file NIHMS1772491-supplement-Figures_S1_S5_and_Table_S2.pdf]

## Supplemental Figure Legend

### Supplemental Figure 1.

**Transcriptomic analysis of TAMs, related to figure 1.** CD45<sup>+</sup>CD11b<sup>+</sup>F4/80<sup>+</sup> macrophages were enriched by flow cytometry sorting from normal pancreas (i.e. resident macrophages, n=4 mice) or PDAC tumors from control (n=3) or *Lyz2<sup>cre/+</sup>Ahr<sup>fl/fl</sup>* (n=3) mice 14 days after tumor implantation. The samples were then analyzed by RNA sequencing. **a)** Volcano plot shows differential expression comparing resident macrophages to control tumor-bearing mice. Red dotted line marks significance threshold (FDR <0.01, logFC>2). **b)** Bar graph of iGSEA analysis of upstream regulators for control TAM versus resident macrophages samples in (a). All columns shown have a pval>0.05. **c)** Flow cytometry analysis for dtTomato expression in d14 intratumoral cell populations indicated in tumor-bearing *Lyz2<sup>cre/+</sup> x Cg-Gt(ROSA)26Sor<sup>tm9(CAG-tdTomato)Hze/J</sup>* mice. Pval determined by unpaired students T test. **d)** Volcano plot for differential expression based on transcriptome analysis of TAMs from control versus *Lyz2<sup>cre/+</sup>Ahr<sup>fl/fl</sup>* tumor bearing mice. Red dotted line marks FDR < 0.05. **e)** Venn diagram showing significantly differentially expressed genes (FDR < 0.05, logFC > ± 1) for the comparisons indicated. **f** and **g)** Heatmaps showing significantly differential expression (FDR <0.01, logFC>2) of selected genes involved in cell cycling (**f**) or extracellular matrix synthesis (**g**). For heat maps each column represents an individual mouse. **h)** Day 14 orthotopic tumor weight.

### Supplemental Figure 2.

**Assessment of the immune infiltrate in *Lyz2<sup>cre/+</sup>Ahr<sup>fl/fl</sup>* mice by CyTOF and single cell RNA sequencing analysis, related to figure 3.** **a)** Heatmap showing relative protein expression for each PhenoGraph generated cluster. Arcsinh transformed MSI for each marker was normalized by z-score and heatmap was generated using ggplots application in R. **b)** Graph showing relative abundance of each PhenoGraph cluster in *Lyz2<sup>cre/+</sup>Ahr<sup>fl/fl</sup>* immune infiltrate relative to Control baseline. NS= Pval not significant as calculated using the DiffCYT package. **c)** UMAP plots showing PhenoGraph clustering of immune infiltrate subpopulations in control vs. *Lyz2<sup>cre/+</sup>Ahr<sup>fl/fl</sup>* mice. UMAP and PhenoGraph were run in R for concatenated CYTOF data from live CD45<sup>+</sup> cells (4 control

31 and 5 *Lyz2<sup>cre/+</sup>Ahr<sup>fl/fl</sup>*) that were down sampled to 5000 events before analysis. Twenty-  
32 four distinct immune clusters were obtained. The experiment was repeated twice with  
33 similar results. **d)** Normalized expression and per cluster percentage expression of top  
34 10 marker genes for each cell cluster for the scRNA sequencing analysis described in  
35 **Fig 3d**. Both relative expression and percent expression were identified with the Seurat  
36 package as described in Methods. Cell labels were assigned to automatically detected  
37 clusters based on the top 10 marker genes. **e)** Normalized gene expression per cell of  
38 different macrophage marker genes projected onto UMAPs of the concatenated scRNA  
39 sequencing of day 14 tumors from *Lyz2<sup>cre/+</sup>Ahr<sup>fl/fl</sup>* mice and littermate controls. **f)** iGSEA  
40 analysis showing enrichment for indicated pathways in macrophage 3 cluster as activated  
41 (positive Z-score; red) or inhibited (negative Z-score; blue).

42

### 43 **Supplemental Figure 3.**

44 **Analysis of the role of IDO on tumor growth and AhR function and 16S**  
45 **sequencing analysis of the fecal microbiome, related to figure 4. a)** Mice were treated  
46 with 1-methyl-tryptophan containing drinking water as previously described (Ravishankar  
47 *et al.*, 2015) for 3 days prior to tumor implantation. Tumors weights were determined at  
48 day 14 post-implantation as described in methods and compared to B6 and B6.*Ido1*<sup>-/-</sup>  
49 mice on control drinking water. **b)** CD45<sup>+</sup>CD11b<sup>+</sup>F4/80<sup>+</sup> TAMs were sorted from the  
50 tumors in **(a)**, and expression of the indicated genes was measured by qPCR as  
51 described in methods normalized for the housekeeping gene *Bactin*. **c)** Mice (n=4/group)  
52 were placed on antibiotic containing drinking water or control water as indicated. 3 days  
53 later tumors were implanted. 14 days after tumor implantation CD45<sup>+</sup>CD11b<sup>+</sup>F4/80<sup>+</sup> TAMs  
54 were isolated by flow cytometric sorting and samples from each group were pooled and  
55 measured for expression of the genes indicated by qPCR. **d)** Boxplots showing alpha  
56 diversity measures calculated at the OTU level using the Simpson index (left panel), the  
57 Shannon index (middle panel), or the observed number of OTUs (right panel). Black  
58 diamonds overlaying the boxes indicate means; boxes show medians and interquartile  
59 ranges. Data points, each of which corresponds to the gut microbiome of one mouse, are  
60 colored according to treatment as shown below each panel. P-values shown above each

61 panel were obtained from Kruskal-Wallis tests. **e)** Relative abundances of the top 10 most  
62 abundant bacterial families (left panel) or genera (right panel). “Others” in both panels  
63 comprises all bacterial taxa that were present but were less abundant. “V6” (left panel)  
64 and “V2” (right panel) includes OTUs whose taxonomies could only be resolved at a  
65 higher level than that shown, e.g., at the order or family level, respectively.

66

#### 67 **Supplemental Figure 4.**

68 **Assessment of the effect antibiotics has on *Lactobacillus* presence in the**  
69 **fecal microbiome and the ability of *Lactobacillus* spp to produce indoles, related**  
70 **to figure 5. a)** B6 mice were placed on antibiotic-containing drinking water as indicated  
71 for 4 days prior to collection of fecal material from the large intestine. 16S sequencing  
72 was performed, and the proportion of total *Lactobacillus* reads detected as well as reads  
73 for specific *Lactobacillus* species as indicated was determined. Relative frequency  
74 refers to the % of total sequencing reads identified belonging to the bacteria indicated.  
75 The experiment was repeated twice with similar results. **b)** *Lactobacilli* spp. indicated  
76 were cultured overnight in triplicate in the media indicated and culture supernatants  
77 were measured for the presence of Trp, lactic acid and the indoles indicated by mass  
78 spectroscopy analysis. **c)** Heat map showing hierarchical clustering depicting detected  
79 metabolites and amino acids indicated by mass spectroscopy analysis. Each column  
80 represents an individual culture. **d)** Principal component analysis of the data described  
81 in **(c)**. Open circles identify *L. murinus* and *L. reuteri* culture data under the 3 culture  
82 conditions. **e)** Germ free B6 mice were gavaged with *L. murinus* or control saline as  
83 indicated and described in Methods. 30 days later fecal material was collected from the  
84 large intestine and the presence of *L. murinus* was determined by PCR as described in  
85 methods. The experiment was repeated twice with similar results. **f)** For the mice  
86 described in **(e)** fecal material was collected from the large intestine and measured for  
87 the indoles indicated by mass spectroscopy. **g)** Fecal measurement of indoles indicated  
88 was done by mass spectroscopy on mice with the microbiome enrichment indicated. P  
89 values were determined by unpaired students T test. Experiment was repeated twice  
90 with similar results.

91

92 **Supplemental Figure 5.**

93 **Cox hazard analysis of *AHR* and OS in the TCGA PAAD cohort and analysis**  
94 **of genes with expression patterns most similar to *AHR*, related to figure 6. a and b)**

95 Forest plots of Cox proportional hazard analyses in TCGA-PAAD data set. **a)** The top  
96 50% and bottom 50% stratified by median *AHR* expression. **b)** The TCGA-PAAD patient  
97 data set stratified by quartiles based on *AHR* expression: lowest 25% (Q1), up to second  
98 quartile (Q2), next quartile (Q3), and highest 25% (Q4). **c)** Normalized expression and  
99 per cluster percentage expression of *AHR* and the top 25 most similarly expressed genes  
100 across cell clusters for the scRNA sequencing analysis described in **Fig 6d**.

101

102

103

104

105

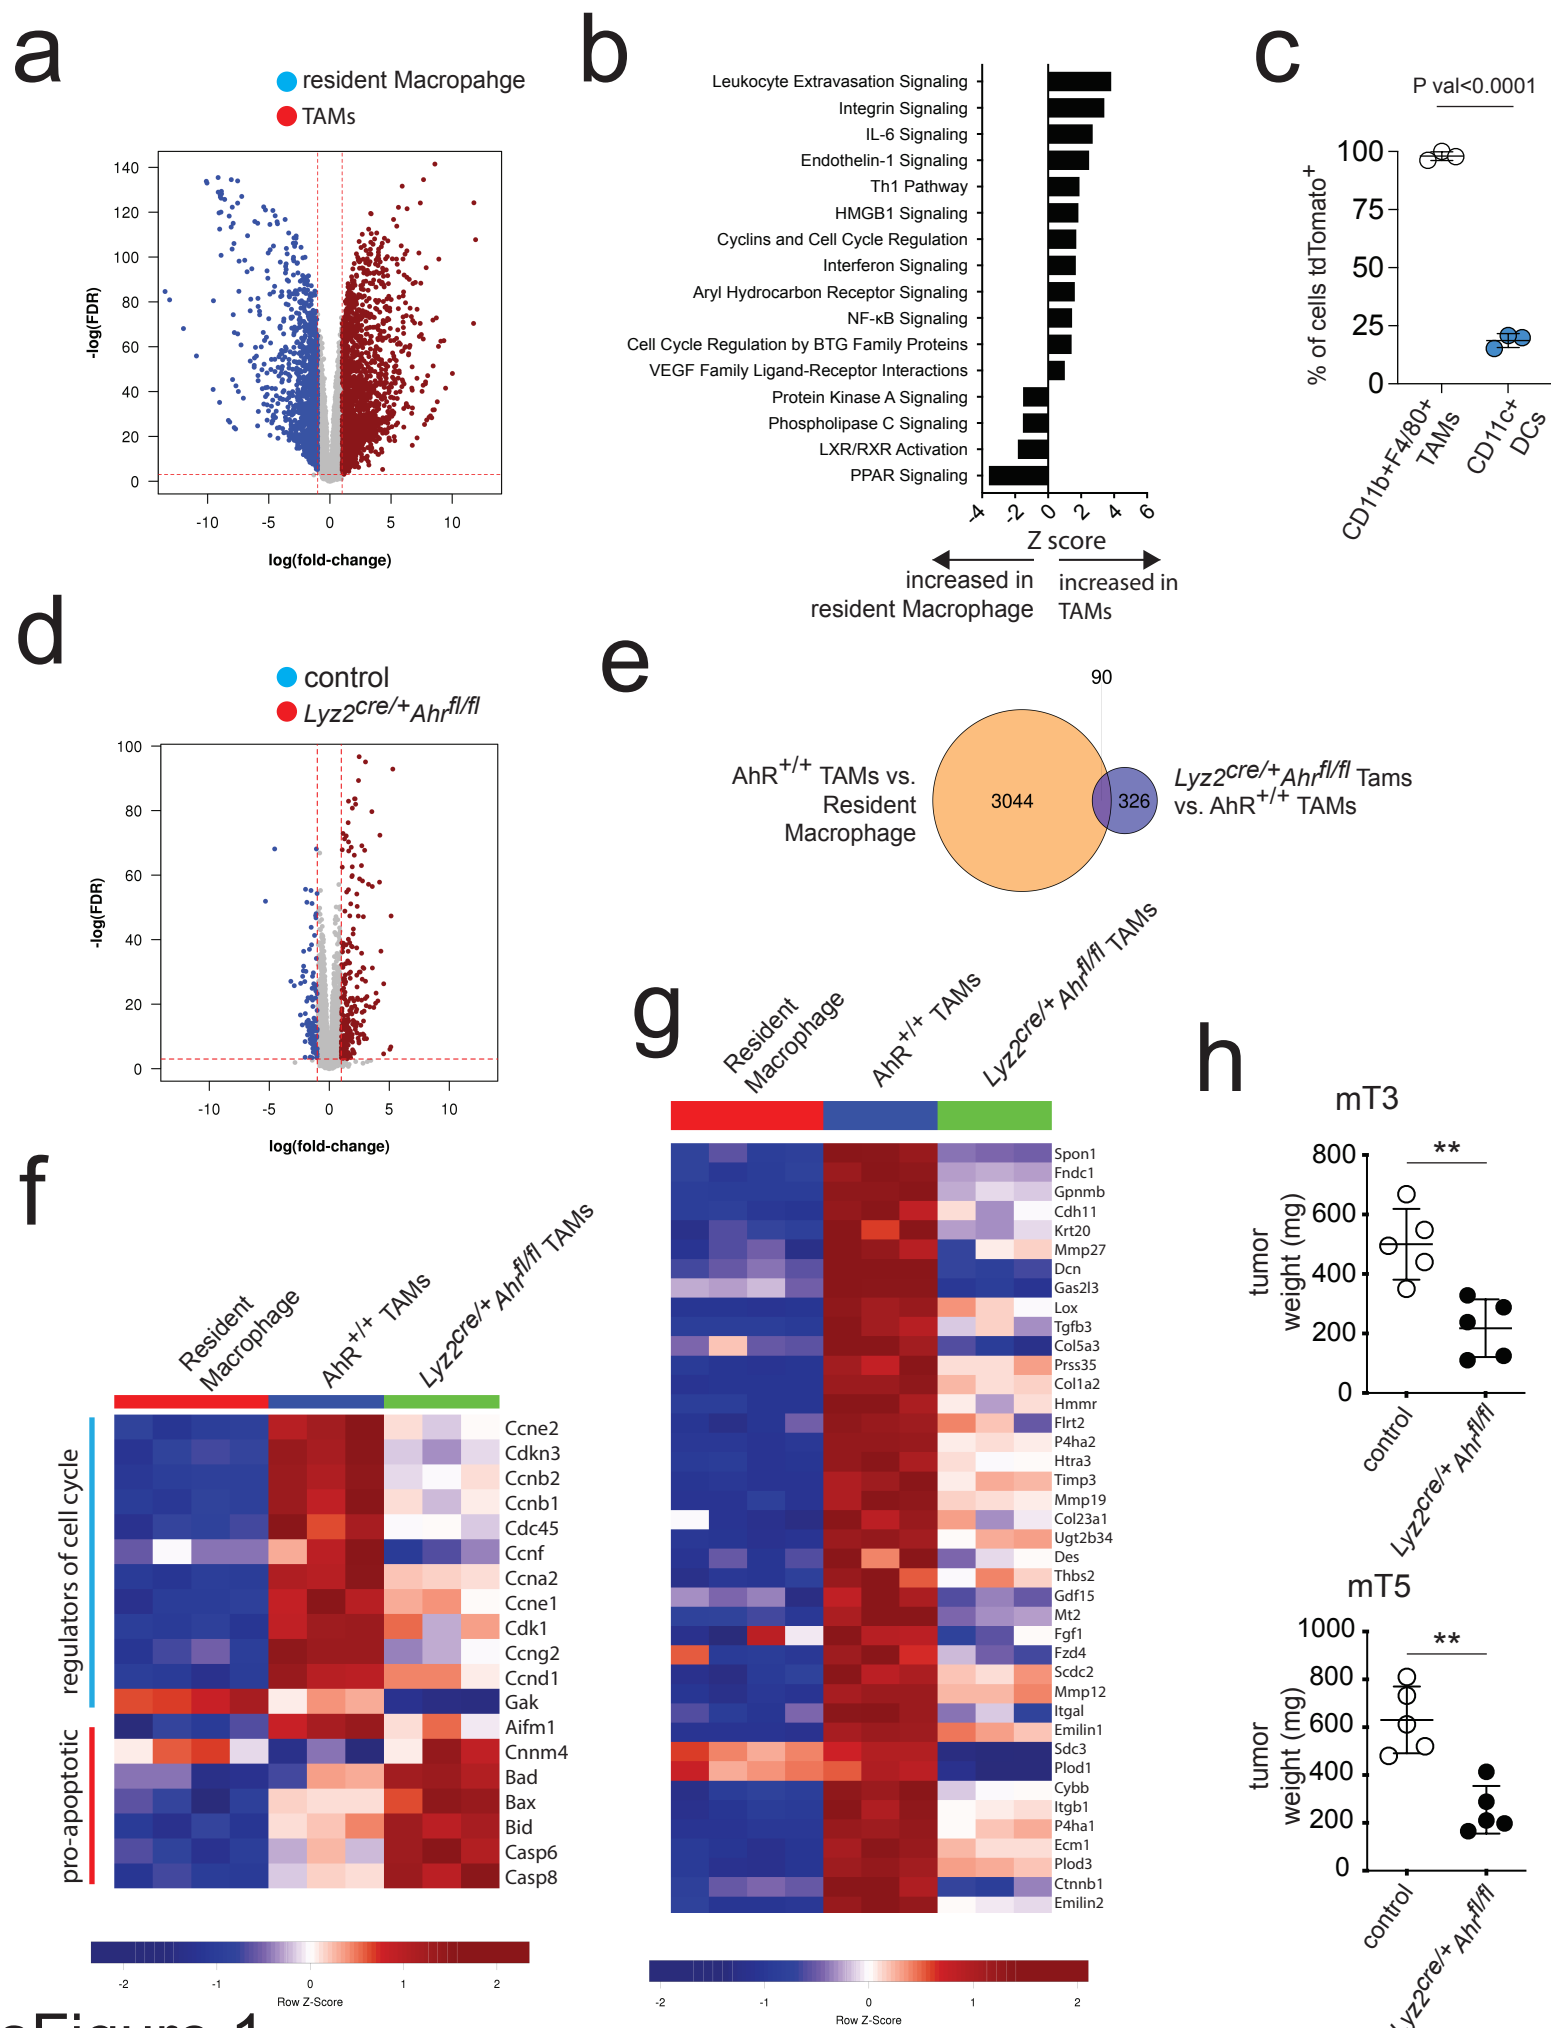

**a**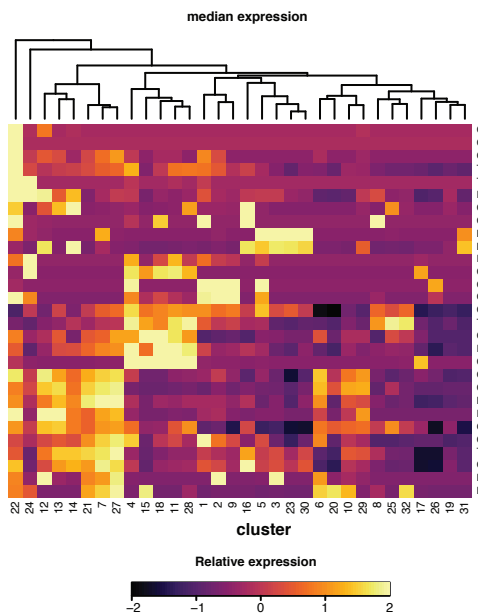**b**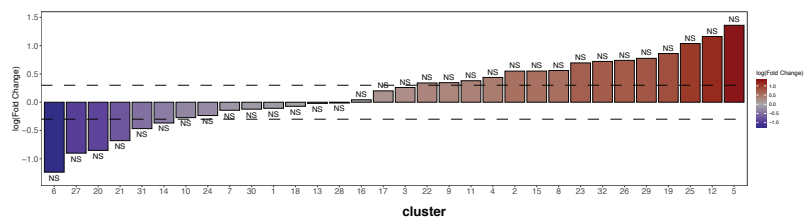**c**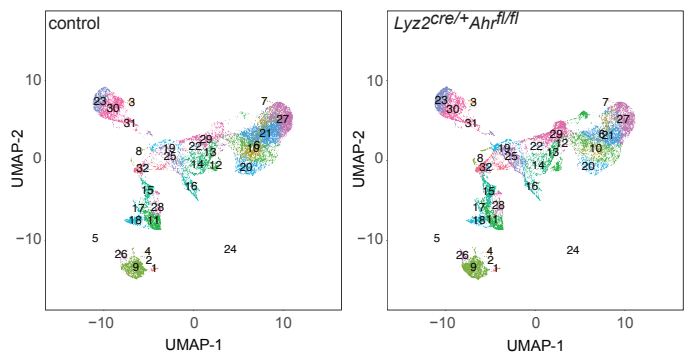**d**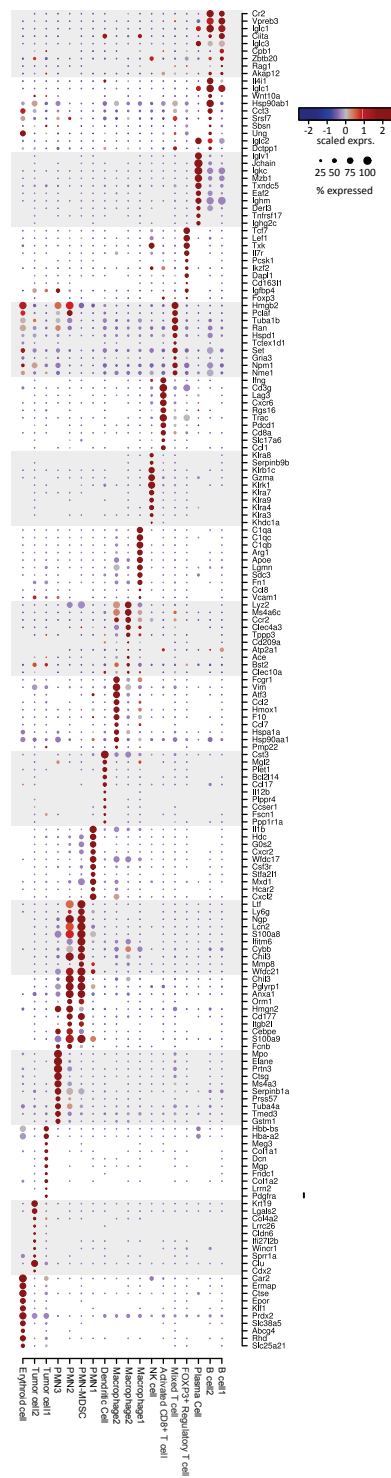**e**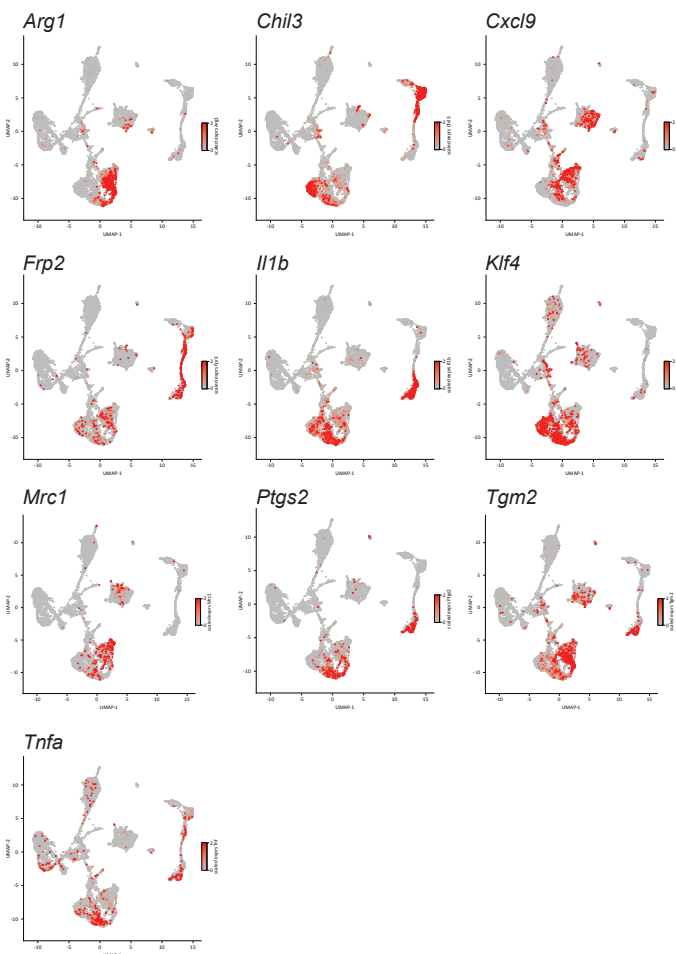**f**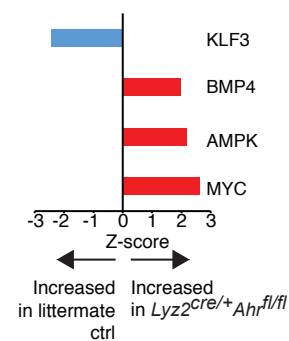

**a**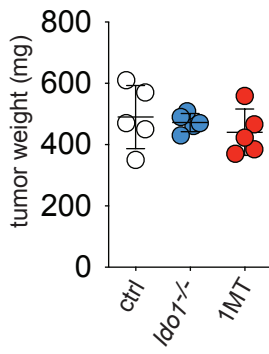**b**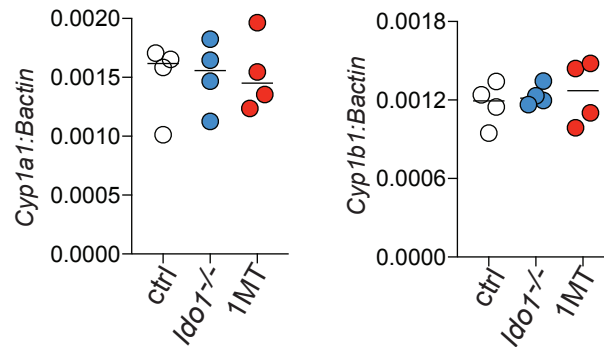**c**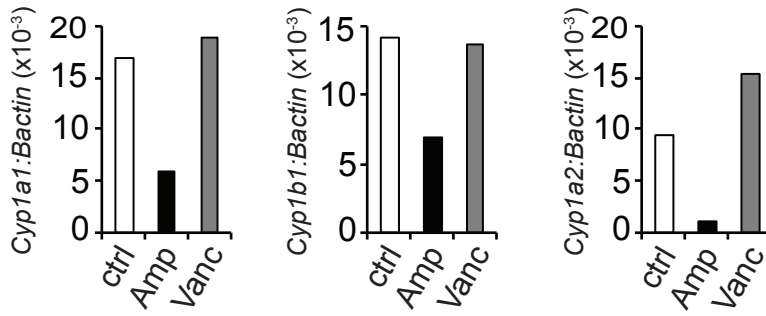**d**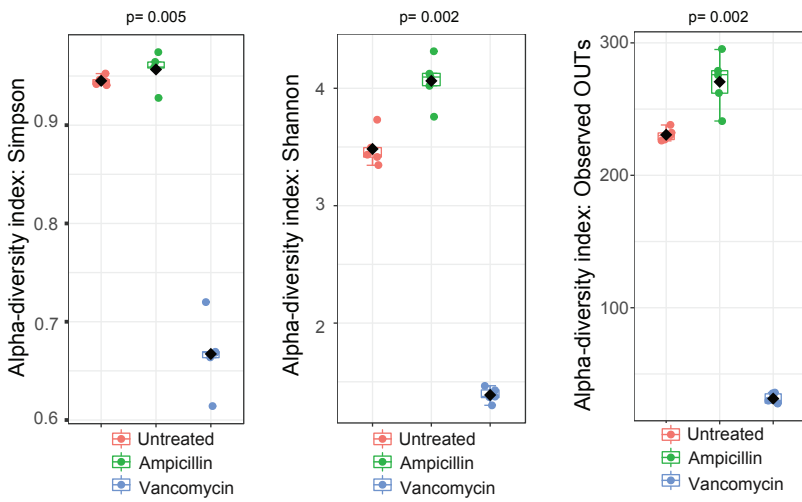**e**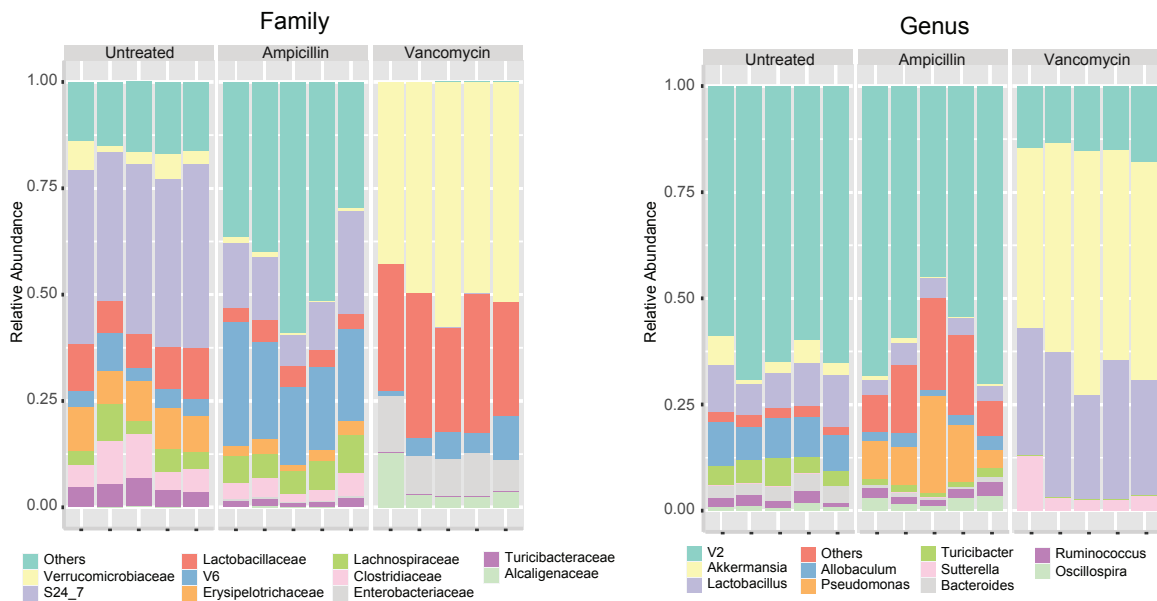

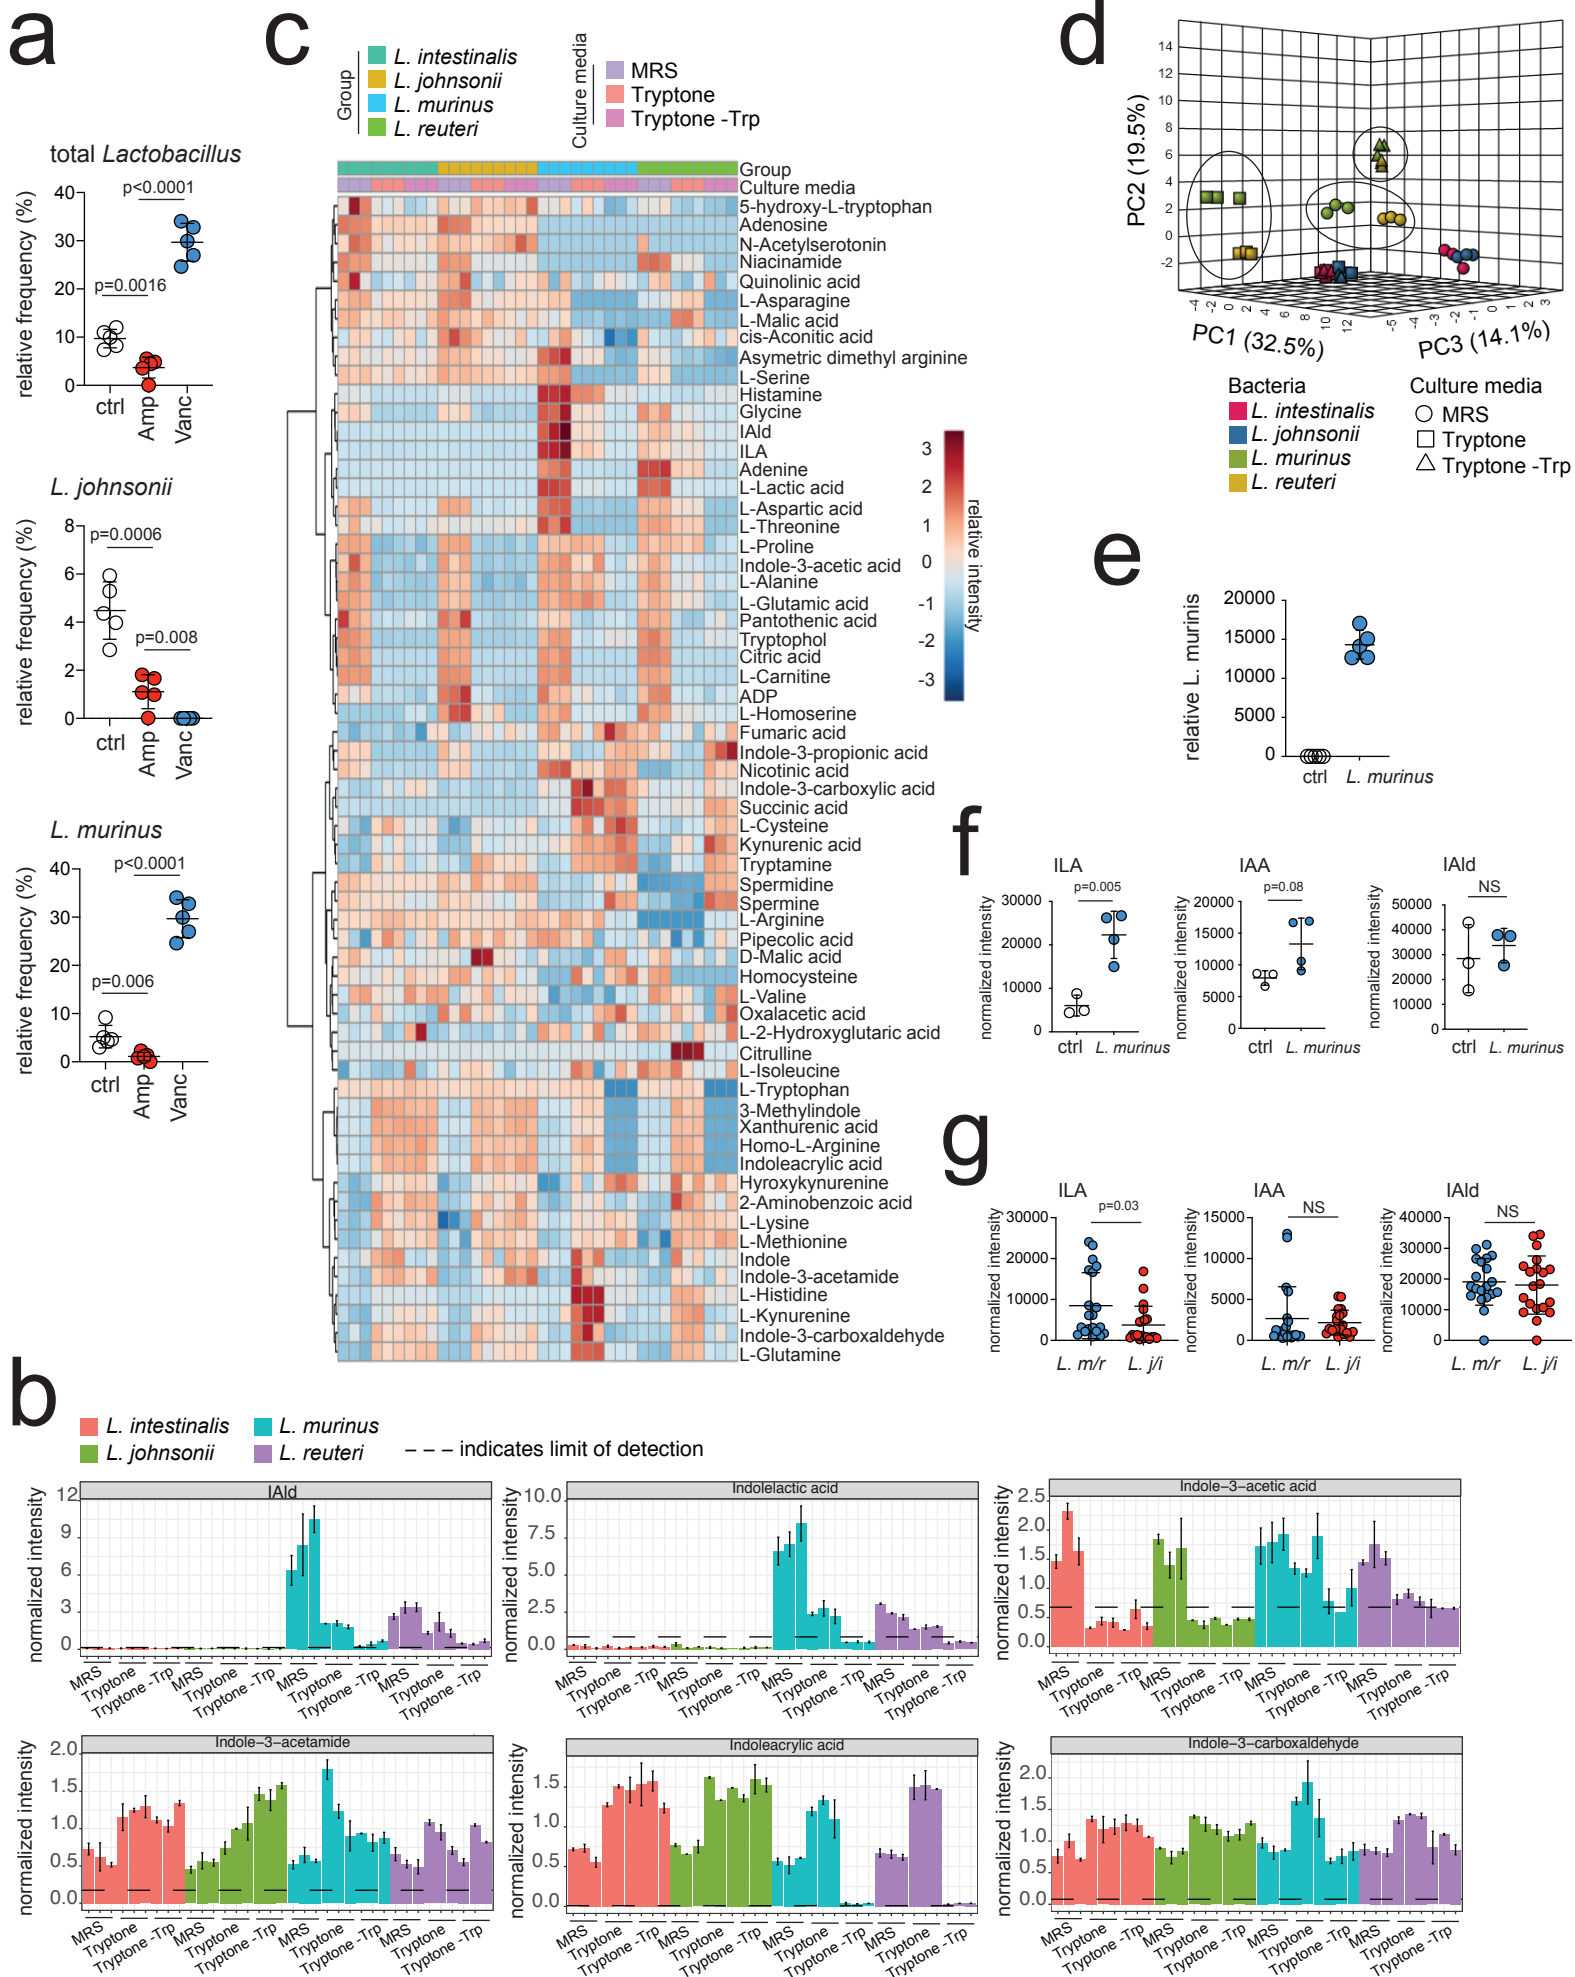

sFigure 4



a

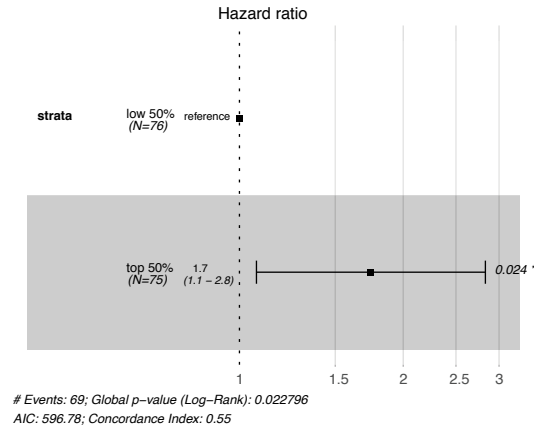

b

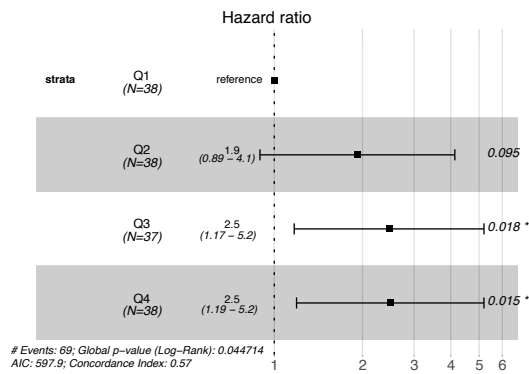

c

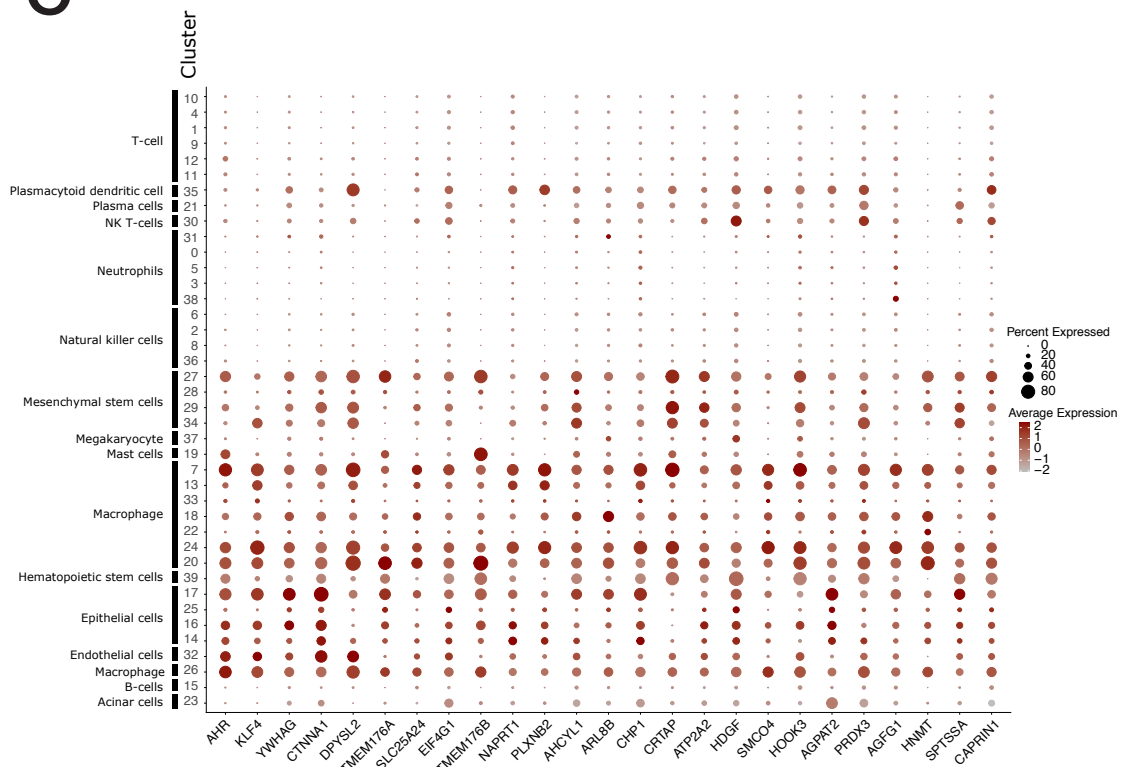

|                                            |
|--------------------------------------------|
| <b>Bacteria</b>                            |
| <b><i>Bacteroides fragilis</i></b>         |
| <b><i>Bacteroides thetaiotaomicron</i></b> |
| <b><i>Bifidobacterium adolescentis</i></b> |
| <b><i>Bifidobacterium bifidum</i></b>      |
| <b><i>Clostridium botulinum</i></b>        |
| <b><i>Clostridium paraputrificum</i></b>   |
| <b><i>Clostridium saccharolyticum</i></b>  |
| <b><i>Clostridium sporogenes</i></b>       |
| <b><i>Faecalibacterium prausnitzii</i></b> |
| <b><i>Lactobacillus acidophilus</i></b>    |
| <b><i>Lactobacillus murinus</i></b>        |
| <b><i>Lactobacillus reuteri</i></b>        |
| <b><i>Parabacteroides distasonis</i></b>   |
| <b><i>Stenotrophomonas maltophilia</i></b> |
| <b><i>Escherichia coli</i></b>             |

**S Table 2, related to figure 6j. Bacterial taxa target for analysis in figure 6j.**
